# Supplementary material
Source: PubMed Central journal article supplement (PMC4972263)
Supplement: supp_pp.16.00113_PP2016-00113R2_Supplemental_Material.pdf [file supp_pp.16.00113_PP2016-00113R2_Supplemental_Material.pdf]

1 **Supplemental information**

2  
3

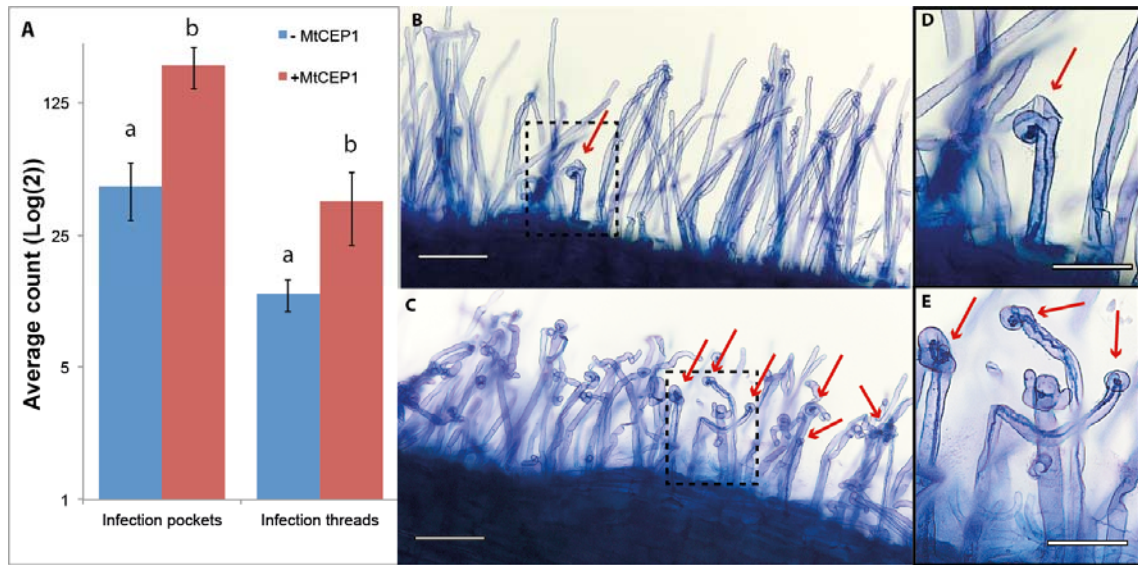

4

5 **Supplemental Figure S1. Assessment of the MtCEP1 peptide effect on**  
6 **infection thread and infection pocket formation.**

7 (A) Plants were grown on an N-free Fåhraeus medium with or without the  
8 MtCEP1 peptide and analysed 72 h post inoculation with the *S. meliloti*  
9 WSM1022 strain. A methylene blue staining was used to assess the number of  
10 infection pockets and infection threads (One-way ANOVA,  $P < 0.001$ ,  $N=12$ ).  
11 (B-E) Representative images of infection threads (indicated by red arrows)  
12 formed on roots without (B) or with (C) MtCEP1. The corresponding boxed  
13 regions are magnified in D and E (Scale bars in B-C = 200  $\mu\text{m}$  and in D-E = 100  
14  $\mu\text{m}$ ).

15

16

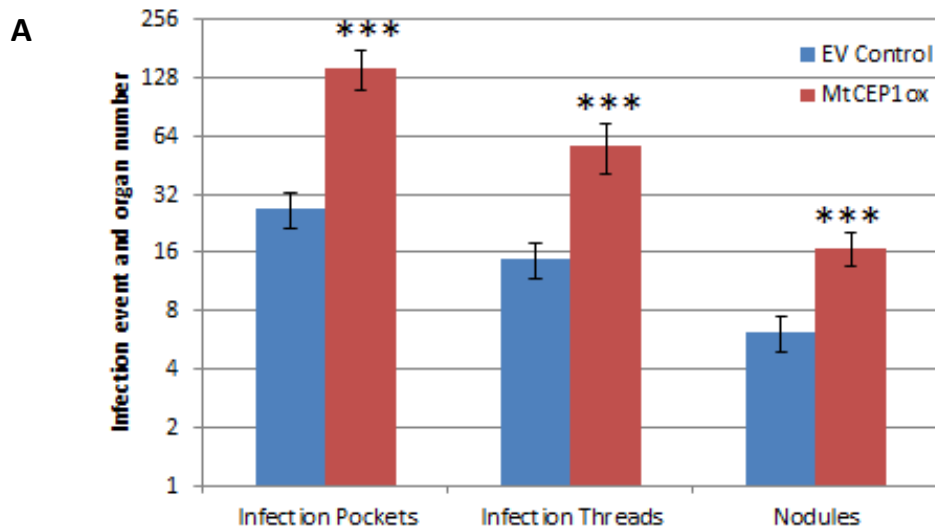

17

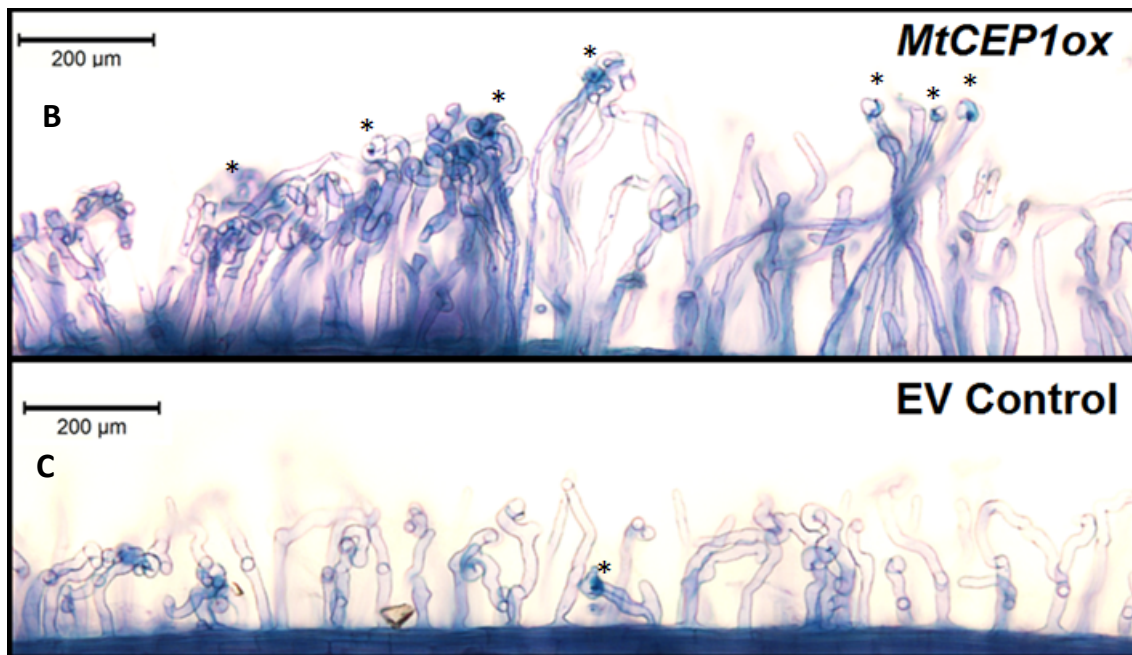

18 **Supplemental Figure 2. *MtCEP1ox* effect on infection thread and infection**  
19 **pocket formation.**

20 (A) Transformed plants were transferred to an N-free Fåhraeus medium for four  
21 days before inoculation with the *S. meliloti* WSM1022 strain. A methylene blue  
22 staining was used to assess the number of infection pockets, infection threads  
23 and nodule number in *MtCEP1ox* expressing plants (*MtCEP1ox*) relatively to  
24 an empty vector (EV) control (Student's t-test,  $p < 0.001$ ,  $n = 9$  for infection  
25 pockets and threads; and Student's t-test,  $p < 0.001$ ,  $n = 7$  for nodule number). (B,

26 C) Representative images of infection threads formed in *MtCEP1ox*  
27 transformed roots (B) or EV control roots (C).

28

29
